# Supplementary material
Source: PubMed Central journal article supplement (PMC2597137)
Supplement: blood-2008-01-137018_2.pdf [file blood-2008-01-137018_2.pdf]

| <b>Gene name</b>                                                             | <b>P-value</b> | <b>Fold</b> |
|------------------------------------------------------------------------------|----------------|-------------|
| RIKEN cDNA 1300007C21 gene related to Calcium/calmodulin-dependent kinase II | 0.027          | 4.99        |
| Neural cell adhesion molecule-180 (NCAM-180)                                 | 0.018          | 2.84        |
| N-ethylmaleimide sensitive fusion protein attachment protein beta (Napb)     | 0.007          | 2.63        |
| Inhibitor of DNA binding 4 (Idb4)                                            | 0.004          | 2.47        |
| Ankyrin repeat and SOCS box-containing protein 4 (Asb4)                      | 0.053          | 1.82        |
| Betacellulin, epidermal growth factor family member                          | 0.026          | 1.82        |
| Mus musculus, clone MGC:6827 IMAGE:2649084                                   | 0.017          | 1.78        |
| Highly similar to bromodomain adjacent to zinc finger domain, 2B             | 0.010          | 1.68        |
| Matrilin 1, cartilage matrix protein 1 (Matn1)                               | 0.022          | 1.66        |
| Insulin-like growth factor binding protein 5 (Igfbp5)                        | 0.012          | 1.64        |
| Similar to tyrosine kinase-protein kinase                                    | 0.025          | 1.61        |
| testase 4                                                                    | 0.034          | 1.56        |
| Similar to hypothetical protein FLJ21657, clone MGC:29320 IMAGE:5011629      | 0.039          | 1.42        |
| poliovirus receptor-related 3 (Pvr13)                                        | 0.046          | 1.23        |
