# Supplementary material
Source: PubMed Central journal article supplement (PMC2597137)
Supplement: blood-2008-01-137018_3.pdf [file blood-2008-01-137018_3.pdf]

| <b>Gene name</b>                                           | <b>P-value</b> | <b>Fold</b> |
|------------------------------------------------------------|----------------|-------------|
| DNA methyltransferase 3A (Dnmt3a)                          | 0.050          | 0.31        |
| Annexin A10                                                | 0.017          | 0.37        |
| RAS guanyl releasing protein 1 (Rasgrp1)                   | 0.031          | 0.52        |
| Mast cell protease 8 (Mcpt8)                               | 0.045          | 0.52        |
| Aldehyde dehydrogenase family 1, subfamily A1 (Aldh1a1)    | 0.001          | 0.53        |
| RIKEN cDNA 130002C13 gene                                  | 0.015          | 0.57        |
| Annexin A4 (Anxa4)                                         | 0.036          | 0.57        |
| Complement component 5, receptor 1 (C5r1)                  | 0.024          | 0.57        |
| Solute carrier family 4 (anion exchanger), member 1        | 0.016          | 0.57        |
| RIKEN cDNA 1700112E06 gene                                 | 0.029          | 0.60        |
| Triggering receptor expressed on myeloid cells 2b (Trem2b) | 0.019          | 0.61        |
| 2,3-bisphosphoglycerate mutase                             | 0.009          | 0.62        |
| B-cell stimulating factor 3 (Bsf3)                         | 0.037          | 0.63        |
| Coated vesicle membrane protein (Rnp24-pending)            | 0.032          | 0.64        |
| Dipeptidyl peptidase 7                                     | 0.011          | 0.65        |
| RIKEN cDNA 2310021J05 gene                                 | 0.044          | 0.66        |
| CD2 antigen (Cd2)                                          | 0.038          | 0.66        |
| Glucose transporter type 3                                 | 0.040          | 0.68        |
| Matrix metalloproteinase-14 (Mmp14)                        | 0.020          | 0.72        |
| Tumor-associated membrane protein (TMP)                    | 0.040          | 0.85        |
